# Supplementary material for: Functional Status of Elderly Adults before and after Initiation of Dialysis
Source: Atypon-hosted journal article supplement (doi:10.1056/nejmoa0904655), 2009-10-14

## Supplementary Appendix

This appendix has been provided by the authors to give readers additional information about their work.

Supplement to: Kurella Tamura M, Covinsky KE, Chertow GM, Yaffe K, Landefeld CS, McCulloch CE. Functional status of elderly adults before and after initiation of dialysis. *N Engl J Med* 2009;361:1539-47.

Supplementary Appendix to: Functional Status of Nursing Home Residents Pre and Post Dialysis Initiation

Table S1. Odds ratio of maintained functional status 12 months after start of dialysis versus death or functional decline by clinical characteristics.

| Characteristic                                                 | Odds ratio of maintained functional status<br>(95% confidence interval) |               |
|----------------------------------------------------------------|-------------------------------------------------------------------------|---------------|
|                                                                | Unadjusted                                                              | Adjusted*     |
| Age (per ten years)                                            | 0.6 (0.5-0.7)                                                           | 0.6 (0.5-0.7) |
| Female (vs. male)                                              | 0.8 (0.7-1.1)                                                           | 1.0 (0.8-1.3) |
| White (vs. nonwhite)                                           | 0.7 (0.6-0.9)                                                           | 0.7 (0.5-0.9) |
| Cerebrovascular disease                                        | 0.7 (0.6-0.9)                                                           | 0.7 (0.5-0.9) |
| Congestive heart failure                                       | 0.7 (0.6-0.9)                                                           | 1.0 (0.7-1.3) |
| Coronary artery disease                                        | 0.8 (0.7-1.0)                                                           | 1.1 (0.8-1.5) |
| Peripheral vascular disease                                    | 0.8 (0.6-1.0)                                                           | 0.8 (0.6-1.1) |
| Cancer                                                         | 0.6 (0.4-0.9)                                                           | 0.9 (0.6-1.3) |
| Dementia                                                       | 0.5 (0.4-0.7)                                                           | 0.6 (0.4-0.9) |
| Hospitalized at start of dialysis                              | 0.5 (0.4-0.6)                                                           | 0.6 (0.5-0.8) |
| Albumin <3.5 g/dL                                              | 0.6 (0.4-0.8)                                                           | 0.6 (0.4-0.8) |
| ADL score prior to start of dialysis<br>(per 5 point increase) | 0.9 (0.8-0.9)                                                           | 1.0 (0.9-1.1) |

\*Note - model adjusted for all covariates shown

Figure S1. Mean scores for individual activities of daily living (ADL) components before start of dialysis and 3 months after start of dialysis (N=2866). Higher scores indicate poorer functional status. P-value <0.001 for all ADL components.

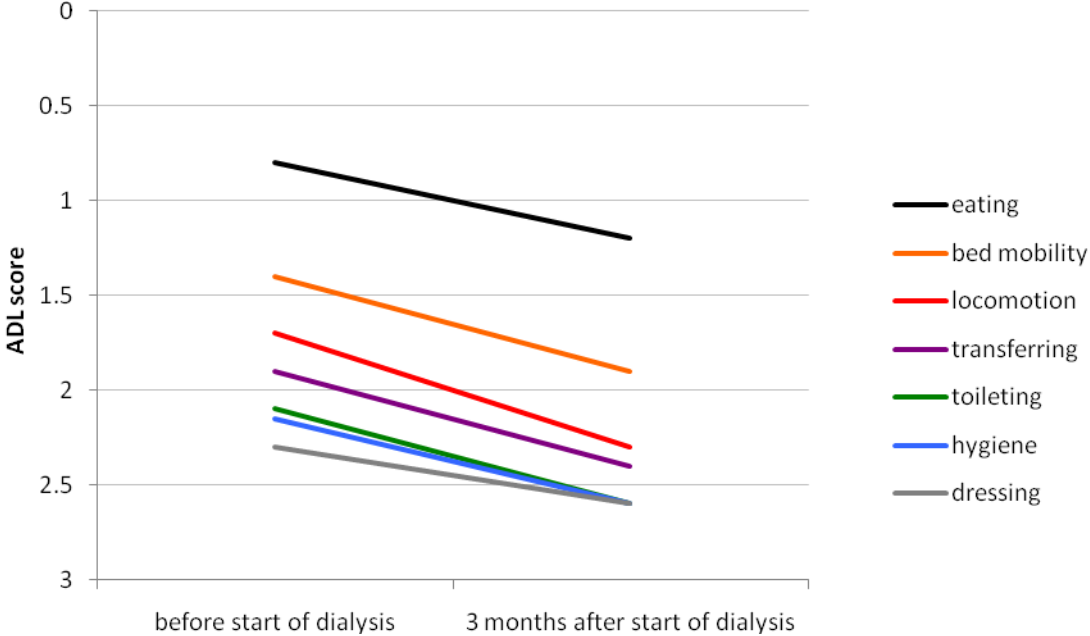

Supplement: nejm_kurella_tamura_1539sa1.pdf [file nejm_kurella_tamura_1539sa1.pdf]
